# Supplementary material
Source: PubMed Central journal article supplement (PMC9200366)
Supplement: NIHMS1814231-supplement-supp_1A.pdf [file NIHMS1814231-supplement-supp_1A.pdf]

Assay Class: High Sensitivity DNA Assay  
 Data Path: G:\...gh Sensitivity DNA Assay\_DE54107446\_2016-08-05\_14-39-37.xad

Created: 8/5/2016 2:39:36 PM  
 Modified: 8/5/2016 3:20:57 PM

**Electropherogram Summary**

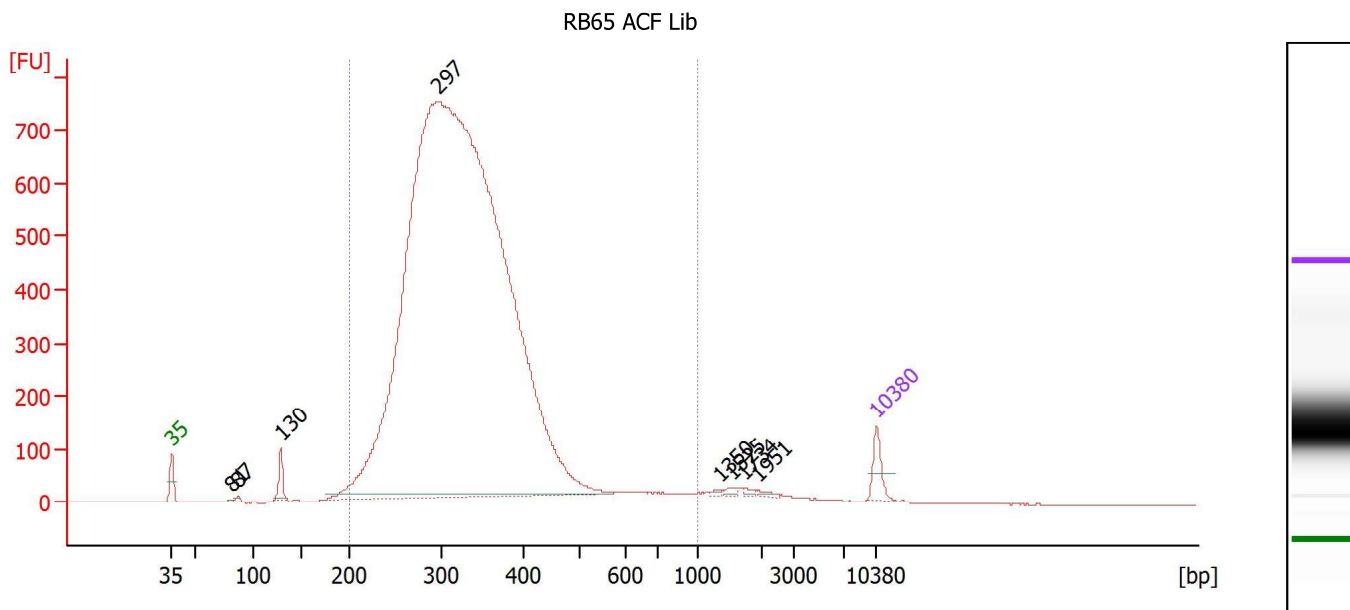

**Overall Results for sample 1 : RB65 ACF Lib**

Number of peaks found: 8                      Corr. Area 1: 12,488.4  
 Noise: 0.4

**Peak table for sample 1 : RB65 ACF Lib**

| Peak | Size [bp] | Conc. [pg/μl] | Molarity [pmol/l] | Observations |
|------|-----------|---------------|-------------------|--------------|
| 1    | 35        | 125.00        | 5,411.3           | Lower Marker |
| 2    | 81        | 6.00          | 112.3             |              |
| 3    | 87        | 10.49         | 182.4             |              |
| 4    | 130       | 106.82        | 1,247.4           |              |
| 5    | 297       | 12,526.76     | 63,861.9          |              |
| 6    | 1,350     | 7.84          | 8.8               |              |
| 7    | 1,525     | 13.35         | 13.3              |              |
| 8    | 1,734     | 12.49         | 10.9              |              |
| 9    | 1,951     | 13.31         | 10.3              |              |
| 10   | 10,380    | 75.00         | 10.9              | Upper Marker |

**Region table for sample 1 : RB65 ACF Lib**

| From [bp] | To [bp] | Corr. Area | % of Total | Average Size [bp] | Size distribution in CV [%] | Conc. [pg/μl] | Molarity [pmol/l] | Color |
|-----------|---------|------------|------------|-------------------|-----------------------------|---------------|-------------------|-------|
| 200       | 1,000   | 12,488.4   | 95         | 335               | 24.6                        | 12,516.53     | 59,813.7          | Blue  |
