# Supplementary material
Source: PubMed Central journal article supplement (PMC9200366)
Supplement: NIHMS1814231-supplement-supp_1B.pdf [file NIHMS1814231-supplement-supp_1B.pdf]

Assay Class: High Sensitivity DNA Assay  
 Data Path: G:\...gh Sensitivity DNA Assay\_DE54107446\_2016-07-19\_15-32-17.xad

Created: 7/19/2016 3:32:17 PM  
 Modified: 7/19/2016 4:13:35 PM

**Electropherogram Summary Continued ...**

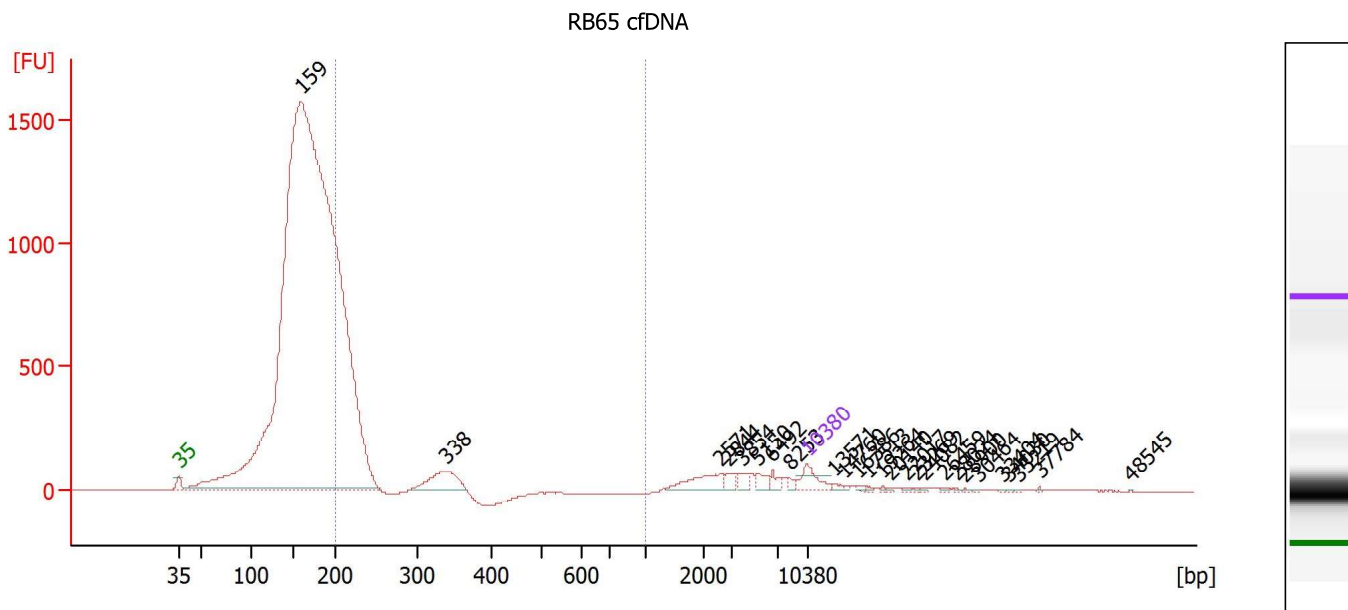

**Overall Results for sample 10 : RB65 cfDNA**

Number of peaks found: 26                      Corr. Area 1: 3,380.8  
 Noise: 0.3

**Peak table for sample 10 : RB65 cfDNA**

| Peak | Size [bp] | Conc. [pg/μl] | Molarity [pmol/l] | Observations |
|------|-----------|---------------|-------------------|--------------|
| 1    | 35        | 125.00        | 5,411.3           | Lower Marker |
| 2    | 159       | 13,696.64     | 130,701.9         |              |
| 3    | 338       | 215.69        | 968.0             |              |
| 4    | 2,571     | 112.79        | 66.5              |              |
| 5    | 2,844     | 28.77         | 15.3              |              |
| 6    | 3,854     | 33.60         | 13.2              |              |
| 7    | 5,150     | 34.97         | 10.3              |              |
| 8    | 6,492     | 32.66         | 7.6               |              |
| 9    | 8,253     | 17.23         | 3.2               |              |
| 10   | 10,380    | 75.00         | 10.9              | Upper Marker |
| 11   | 13,571    | 0.00          | 0.0               |              |
| 12   | 14,760    | 0.00          | 0.0               |              |
| 13   | 16,386    | 0.00          | 0.0               |              |
| 14   | 17,513    | 0.00          | 0.0               |              |
| 15   | 19,264    | 0.00          | 0.0               |              |
| 16   | 20,140    | 0.00          | 0.0               |              |
| 17   | 22,017    | 0.00          | 0.0               |              |
| 18   | 23,269    | 0.00          | 0.0               |              |
| 19   | 24,082    | 0.00          | 0.0               |              |
| 20   | 26,459    | 0.00          | 0.0               |              |
| 21   | 28,024    | 0.00          | 0.0               |              |
| 22   | 28,900    | 0.00          | 0.0               |              |
| 23   | 30,464    | 0.00          | 0.0               |              |
| 24   | 33,404    | 0.00          | 0.0               |              |
| 25   | 34,030    | 0.00          | 0.0               |              |
| 26   | 35,219    | 0.00          | 0.0               |              |
